# Supplementary material
Source: HighWire-hosted journal article supplement (https://bmjopen.bmj.com/content/11/12/e048145)
Supplement: inline-supplementary-material-1 [file inline-supplementary-material-1.pdf]

**Table S1. Primary diagnoses of infants 1-20 days of age who presented to Young Infant Clinical Signs Study Group sites for evaluation**

| Primary diagnosis               | N   | %    | Cumulative % |
|---------------------------------|-----|------|--------------|
| Jaundice                        | 756 | 28.6 | 28.6         |
| URTI / mild ARI                 | 233 | 8.8  | 37.4         |
| Skin infection                  | 195 | 7.4  | 44.8         |
| Eye infection                   | 189 | 7.2  | 52.0         |
| Sepsis                          | 166 | 6.3  | 58.2         |
| Feeding problem                 | 94  | 3.6  | 61.8         |
| Gastrocolic reflex              | 83  | 3.1  | 65.0         |
| Birth asphyxia                  | 65  | 2.5  | 67.4         |
| Congenital malformation         | 61  | 2.3  | 69.7         |
| Skin condition (non-infectious) | 59  | 2.2  | 72.0         |
| Birth injury                    | 58  | 2.20 | 74.2         |
| Colic                           | 48  | 1.8  | 76.0         |
| Diarrhea                        | 45  | 1.70 | 77.7         |
| Prematurity                     | 41  | 1.6  | 79.2         |
| Umbilical infection             | 41  | 1.6  | 80.8         |
| Pneumonia / ALRI                | 37  | 1.4  | 82.2         |
| Oral thrush                     | 29  | 1.1  | 83.3         |
| Cephalohematoma                 | 25  | 1.0  | 84.2         |
| Nasolacrimal duct block         | 20  | 0.8  | 85.0         |
| High environmental temperature  | 17  | 0.6  | 85.6         |
| Regurgitation                   | 16  | 0.6  | 86.2         |
| Umbilical problem               | 16  | 0.6  | 86.8         |
| Low birth weight                | 14  | 0.5  | 87.4         |
| Seizures                        | 12  | 0.4  | 87.8         |
| Breast abscess                  | 12  | 0.4  | 88.3         |
| Meningitis                      | 9   | 0.3  | 88.6         |
| Constipation                    | 9   | 0.3  | 89.0         |
| Hypoglycaemia                   | 5   | 0.2  | 89.1         |

|                              |       |       |      |
|------------------------------|-------|-------|------|
| Laryngomalacia               | 5     | 0.2   | 89.3 |
| Transient tachypnoea         | 3     | 0.1   | 89.4 |
| Meconium aspiration syndrome | 3     | 0.1   | 89.6 |
| Hypothermia                  | 3     | 0.1   | 89.7 |
| Dysentery (bloody stools)    | 3     | 0.1   | 89.8 |
| Intestinal obstruction       | 3     | 0.1   | 89.9 |
| None                         | 150   | 5.7   | 96.1 |
| Other ( $\leq 2$ cases)      | 117   | 4.4   | ---  |
| Total                        | 2,642 | 100.0 |      |

\*Note that percentages are rounded off to the nearest 0.1; they add to 100% over the entire sample

Abbreviations: ALRI, acute lower respiratory infection; ARI, acute respiratory infection; URTI, upper respiratory tract infection
